# Supplementary material
Source: PubMed Central journal article supplement (PMC5991615)
Supplement: NIHMS969732-supplement-1.pdf [file NIHMS969732-supplement-1.pdf]

## **Appendix**

### **Supplementary methods**

At baseline, patients underwent several assessments, including demographics, medical history, vital signs, Eastern Cooperative Oncology Group performance status, electrocardiogram, echocardiogram, ophthalmologic assessment, blood laboratory analysis, and physical examination with dermatologic assessment. Disease at baseline was assessed using contrast-enhanced brain magnetic resonance imaging (MRI), computed tomography (CT) scan of the chest, abdomen, and pelvis or MRI scan of the abdomen and pelvis; and clinical assessment for palpable and/or cutaneous lesions using callipers or photography.

All types of response rates (intracranial, extracranial, and overall) were defined as the percentage of patients achieving a confirmed complete or partial response from the start of treatment until disease progression or the start of new anti-cancer therapy.

Progression-free survival was defined as the interval of time (in months) between the date of first dose of study treatment and the earliest of the date of overall disease progression and the date of death due to any cause. Duration of intracranial/extracranial/overall response were summarised for patients with a confirmed intracranial complete or partial response and were defined as the time (in months) from the initial response to first documented intracranial/extracranial/overall response disease progression or death due to any cause.

The date of new anticancer therapy was defined as the earliest date of the initiation of on-study or post-study treatment systemic anticancer therapy, radiotherapy, and surgery. If anticancer therapy was started without documented overall disease progression or prior to documented overall disease progression, then progression-free survival was censored at the date of the last adequate assessment that was on or before the date of initiation of anticancer therapy (ie, if an assessment occurred on the same day as the start of new anticancer therapy, the assessment was used). The date of response at the last adequate assessment was used as the censoring value.

## Supplementary data

**Table S1: Key characteristics of patients with melanoma brain metastases by cohort in COMBI-MB**

|                                             | <b>Cohort A<br/>(n=76)</b> | <b>Cohort B<br/>(n=16)</b> | <b>Cohort C<br/>(n=16)</b> | <b>Cohort D<br/>(n=17)</b> |
|---------------------------------------------|----------------------------|----------------------------|----------------------------|----------------------------|
| <i>BRAF</i> mutation genotype*              | V600E                      | V600E                      | V600D/K/R                  | V600D/E/K/R                |
| Symptom status of melanoma brain metastases | Asymptomatic               | Asymptomatic               | Asymptomatic               | Symptomatic                |
| Prior local therapy status                  | Without                    | With                       | With or without            | With or without            |
| ECOG performance status                     | 0–1                        | 0–1                        | 0–1                        | 0–2                        |

ECOG=Eastern Cooperative Oncology Group.

\*Locally confirmed for cohorts A (per latest protocol amendment) B, C, and D.

**Table S2: Patient disposition**

| <b>Patient status, n (%)</b> | <b>Cohort A<br/>(n=76)</b> | <b>Cohort B<br/>(n=16)</b> | <b>Cohort C<br/>(n=16)</b> | <b>Cohort D<br/>(n=17)</b> | <b>Total<br/>(N=125)</b> |
|------------------------------|----------------------------|----------------------------|----------------------------|----------------------------|--------------------------|
| Died                         | 44 (58)                    | 7 (44)                     | 13 (81)                    | 13 (76)                    | 77 (62)                  |
| Ongoing                      | 31 (41)                    | 8 (50)                     | 3 (19)                     | 2 (12)                     | 44 (35)                  |
| On-study treatment           | 14 (18)                    | 2 (13)                     | 0                          | 0                          | 16 (13)                  |
| In follow-up                 | 17 (22)                    | 6 (38)                     | 3 (19)                     | 2 (12)                     | 28 (22)                  |
| Withdrawn from study         | 1 (1)                      | 1 (6)                      | 0                          | 2 (12)                     | 4 (3)                    |

**Table S3: Summary of proportion of responses (complete or partial) achieved by week 4 and week 8**

|                              | <b>Cohort A</b> | <b>Cohort B</b> | <b>Cohort C</b> | <b>Cohort D</b> |
|------------------------------|-----------------|-----------------|-----------------|-----------------|
| <b>Intracranial response</b> |                 |                 |                 |                 |
| Total response observed, N*  | 44              | 9               | 7               | 10              |
| Week 4, n (% of N)           | 39 (89)         | 3 (33)          | 3 (43)          | 7 (70)          |
| Week 8, n (% of N)           | 4 (9)           | 2 (22)          | 3 (43)          | 0               |
| <b>Extracranial response</b> |                 |                 |                 |                 |
| Total response observed, N*  | 42              | 7               | 12              | 7               |
| Week 4, n (% of N)           | 28 (67)         | 6 (86)          | 8 (67)          | 5 (71)          |
| Week 8, n (% of N)           | 11 (26)         | 0               | 3 (25)          | 1 (14)          |
| <b>Overall response</b>      |                 |                 |                 |                 |
| Total response observed, N*  | 44              | 9               | 7               | 11              |
| Week 4, n (% of N)           | 36 (82)         | 4 (44)          | 4 (57)          | 8 (73)          |
| Week 8, n (% of N)           | 7 (16)          | 1 (11)          | 2 (29)          | 0               |

\*As of the data cutoff date.

**Table S4: Patterns of disease progression**

| <b>Progression category, n (%)</b>     | <b>Cohort A<br/>(n=76)</b> | <b>Cohort B<br/>(n=16)</b> | <b>Cohort C<br/>(n=16)</b> | <b>Cohort D<br/>(n=17)</b> | <b>Total<br/>(N=125)</b> |
|----------------------------------------|----------------------------|----------------------------|----------------------------|----------------------------|--------------------------|
| Intracranial only                      | 36 (47)                    | 10 (63)                    | 10 (63)                    | 10 (59)                    | 66 (53)                  |
| Extracranial only                      | 7 (9)                      | 1 (6)                      | 3 (19)                     | 0                          | 11 (9)                   |
| Intracranial and extracranial          | 19 (25)                    | 1 (6)                      | 3 (19)                     | 5 (29)                     | 28 (22)                  |
| Neither intracranial nor extracranial* | 14 (18)                    | 4 (25)                     | 0                          | 2 (12)                     | 20 (16)                  |

\*Patients did not have disease progression in intracranial nor extracranial lesions while on study treatment.

**Table S5: Summary of subsequent therapy**

| <b>Category, n (%)</b>                 | <b>Cohort A<br/>(n=76)</b> | <b>Cohort B<br/>(n=16)</b> | <b>Cohort C<br/>(n=16)</b> | <b>Cohort D<br/>(n=17)</b> |
|----------------------------------------|----------------------------|----------------------------|----------------------------|----------------------------|
| Post-progression systemic therapy      |                            |                            |                            |                            |
| Immunotherapy                          | 34 (45)                    | 7 (44)                     | 5 (31)                     | 6 (35)                     |
| anti-CTLA-4                            | 9 (12)                     | 5 (31)                     | 3 (19)                     | 1 (6)                      |
| anti-PD-1                              | 32 (42)                    | 4 (25)                     | 3 (19)                     | 6 (35)                     |
| anti-PD-L1                             | 0                          | 0                          | 0                          | 0                          |
| Chemotherapy                           | 8 (11)                     | 0                          | 2 (13)                     | 2 (12)                     |
| Small-molecule targeted therapy        | 13 (17)                    | 3 (19)                     | 4 (25)                     | 3 (18)                     |
| Dabrafenib                             | 8 (11)                     | 2 (13)                     | 4 (25)                     | 2 (12)                     |
| Trametinib                             | 1 (1)                      | 1 (6)                      | 3 (19)                     | 0                          |
| Biological                             | 1 (1)                      | 0                          | 0                          | 0                          |
| On-treatment or post-treatment therapy |                            |                            |                            |                            |
| Anticancer surgical procedure          | 6 (8)                      | 1 (1)                      | 2 (13)                     | 3 (18)                     |
| Radiotherapy procedure                 | 35 (46)                    | 10 (13)                    | 9 (56)                     | 9 (12)                     |

**Table S6: Serious adverse events (SAEs) experienced by at least 2 patients in any cohort**

| SAE, n (%)                  | Cohort A (n=76) |           | Cohort B (n=16) |           | Cohort C (n=16) |           | Cohort D (n=17) |           | Total (N=125) |           |
|-----------------------------|-----------------|-----------|-----------------|-----------|-----------------|-----------|-----------------|-----------|---------------|-----------|
|                             | Any grade       | Grade 3/4 | Any grade     | Grade 3/4 |
| Any                         | 26 (34)         | 14 (18)   | 5 (31)          | 5 (31)    | 4 (25)          | 3 (19)    | 9 (53)          | 3 (18)    | 44 (35)       | 25 (20)   |
| Pyrexia                     | 4 (5)           | 0         | 1 (6)           | 0         | 2 (13)          | 0         | 2 (12)          | 0         | 9 (7)         | 0         |
| Atrial fibrillation         | 2 (3)           | 0         | 0               | 0         | 0               | 0         | 0               | 0         | 2 (2)         | 0         |
| Ejection fraction decreased | 2 (3)           | 1 (1)     | 0               | 0         | 1 (6)           | 1 (6)     | 2 (12)          | 0         | 5 (4)         | 2 (2)     |
| Epilepsy                    | 2 (3)           | 1 (1)     | 0               | 0         | 0               | 0         | 0               | 0         | 2 (2)         | 1 (1)     |
| Seizure                     | 2 (3)           | 2 (3)     | 0               | 0         | 0               | 0         | 1 (6)           | 0         | 3 (2)         | 2 (2)     |
| Syncope                     | 2 (3)           | 0         | 0               | 0         | 0               | 0         | 0               | 0         | 2 (2)         | 0         |

**Table S7: Summary of adverse events (AEs) leading to dose adjustments or permanent discontinuation**

| Category, n (%)                  | Cohort A (n=76) | Cohort B (n=16) | Cohort C (n=16) | Cohort D (n=17) | Total (N=125) |
|----------------------------------|-----------------|-----------------|-----------------|-----------------|---------------|
| AEs                              | 74 (97)         | 16 (100)        | 16 (100)        | 17 (100)        | 123 (98)      |
| AEs related to study treatment   | 62 (82)         | 15 (94)         | 14 (88)         | 17 (100)        | 108 (86)      |
| AEs leading to discontinuation   | 6 (8)           | 3 (19)          | 0               | 3 (18)          | 12 (10)       |
| AEs leading to dose reduction    | 17 (22)         | 4 (25)          | 2 (13)          | 5 (29)          | 28 (22)       |
| AEs leading to dose interruption | 35 (46)         | 10 (63)         | 9 (56)          | 8 (47)          | 62 (50)       |
| Serious AEs (SAEs)               | 26 (34)         | 5 (31)          | 4 (25)          | 9 (53)          | 44 (35)       |
| SAEs related to study treatment  | 11 (14)         | 3 (19)          | 4 (25)          | 6 (35)          | 24 (19)       |
| Fatal SAEs                       | 1 (1)*          | 0               | 0               | 0               | 1 (<1)        |

\*Intracranial tumour haemorrhage not related to study treatment.

**Table S8: Serious adverse events (SAEs) related to dabrafenib or trametinib**

| SAE (any grade), n (%)                   | Cohort A (n=76) | Cohort B (n=16) | Cohort C (n=16) | Cohort D (n=17) | Total (N=125) |
|------------------------------------------|-----------------|-----------------|-----------------|-----------------|---------------|
| <b><i>Dabrafenib-related</i></b>         |                 |                 |                 |                 |               |
| Any                                      | 6 (8)           | 3 (19)          | 4 (25)          | 5 (29)          | 18 (14)       |
| Pyrexia                                  | 3 (4)           | 1 (6)           | 2 (13)          | 2 (12)          | 8 (6)         |
| Atrial fibrillation                      | 2 (3)           | 0               | 0               | 0               | 2 (2)         |
| Chills                                   | 0               | 0               | 1 (6)           | 1 (6)           | 2 (2)         |
| Ejection fraction decreased              | 0               | 0               | 1 (6)           | 1 (6)           | 2 (2)         |
| Acute kidney injury                      | 1 (1)           | 0               | 0               | 0               | 1 (<1)        |
| Cardiomyopathy                           | 0               | 0               | 1 (6)           | 0               | 1 (<1)        |
| Confusional state                        | 0               | 1 (6)           | 0               | 0               | 1 (<1)        |
| Dehydration                              | 0               | 1 (6)           | 0               | 0               | 1 (<1)        |
| Diarrhoea                                | 0               | 0               | 1 (6)           | 0               | 1 (<1)        |
| Fatigue                                  | 0               | 0               | 1 (6)           | 0               | 1 (<1)        |
| Headache                                 | 0               | 0               | 0               | 1 (6)           | 1 (<1)        |
| Hypotension                              | 0               | 1 (6)           | 0               | 0               | 1 (<1)        |
| Neck pain                                | 0               | 0               | 0               | 1 (6)           | 1 (<1)        |
| Pancreatitis                             | 1 (1)           | 0               | 0               | 0               | 1 (<1)        |
| Renal failure                            | 0               | 0               | 0               | 1 (6)           | 1 (<1)        |
| Transaminase increased                   | 0               | 1 (6)           | 0               | 0               | 1 (<1)        |
| Vomiting                                 | 1 (1)           | 0               | 0               | 0               | 1 (<1)        |
| <b><i>Trametinib-related</i></b>         |                 |                 |                 |                 |               |
| Any                                      | 8 (11)          | 2 (13)          | 4 (25)          | 2 (12)          | 16 (13)       |
| Ejection fraction increased              | 2 (3)           | 0               | 1 (6)           | 2 (12)          | 5 (4)         |
| Atrial fibrillation                      | 2 (3)           | 0               | 0               | 0               | 2 (2)         |
| Cardiac failure                          | 1 (1)           | 0               | 0               | 0               | 1 (<1)        |
| Cardiomyopathy                           | 0               | 0               | 1 (6)           | 0               | 1 (<1)        |
| Chills                                   | 0               | 0               | 1 (6)           | 0               | 1 (<1)        |
| Confusional state                        | 0               | 1 (6)           | 0               | 0               | 1 (<1)        |
| Detachment of retinal pigment epithelium | 1 (1)           | 0               | 0               | 0               | 1 (<1)        |
| Diarrhoea                                | 0               | 0               | 1 (6)           | 0               | 1 (<1)        |
| Fatigue                                  | 0               | 0               | 1 (6)           | 0               | 1 (<1)        |
| Hypotension                              | 0               | 1 (6)           | 0               | 0               | 1 (<1)        |
| Myocarditis                              | 1 (1)           | 0               | 0               | 0               | 1 (<1)        |
| Pyrexia                                  | 0               | 1 (6)           | 0               | 0               | 1 (<1)        |
| Squamous cell carcinoma                  | 0               | 0               | 1 (6)           | 0               | 1 (<1)        |
| Transaminases increased                  | 0               | 1 (6)           | 0               | 0               | 1 (<1)        |
| Troponin T increased                     | 1 (1)           | 0               | 0               | 0               | 1 (<1)        |
| Vomiting                                 | 1 (1)           | 0               | 0               | 0               | 1 (<1)        |

**Figure S1: Duration of intracranial response in cohort A by independent assessment**

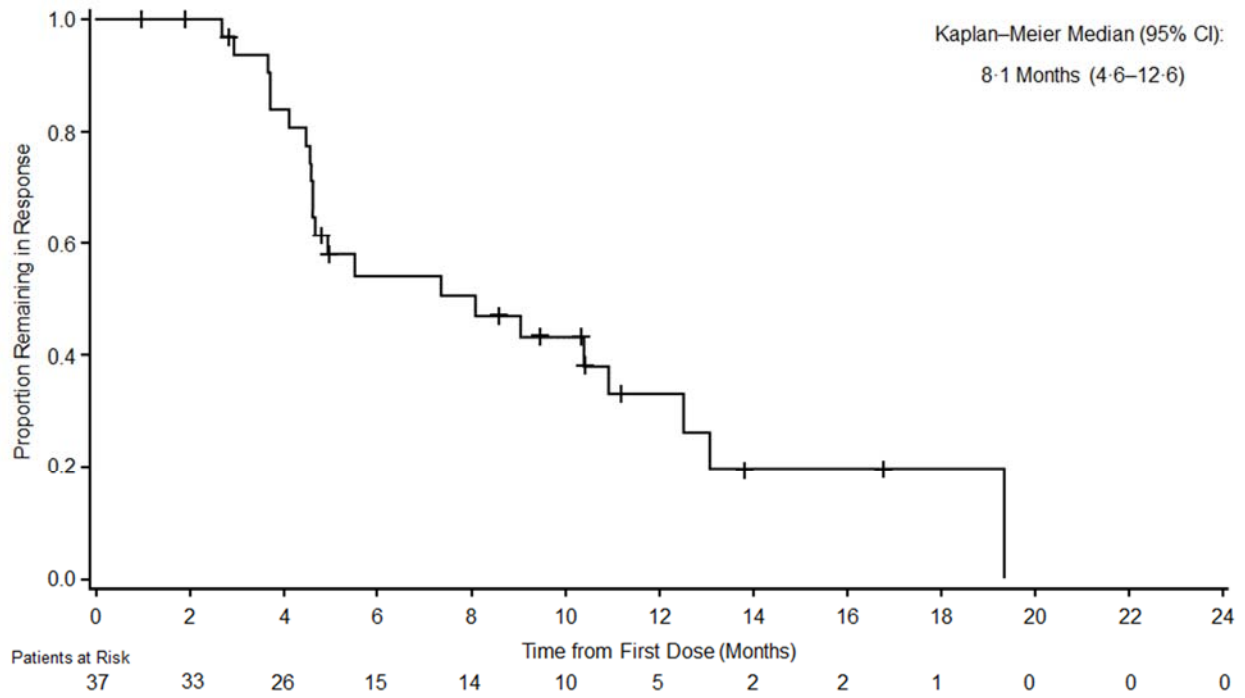

**Figure S2: Progression-free survival in cohort A by independent assessment**

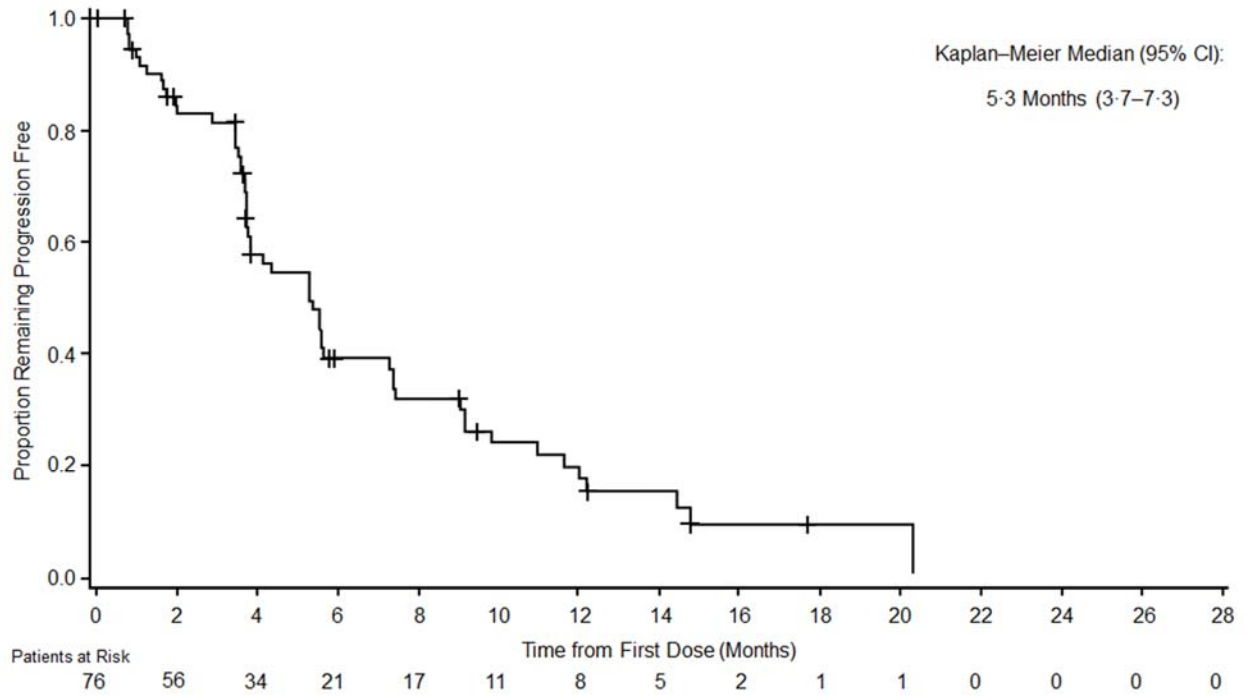

**Figure S3: Progression-free survival in cohort B (A), cohort C (B), and cohort D (C) by investigator assessment**

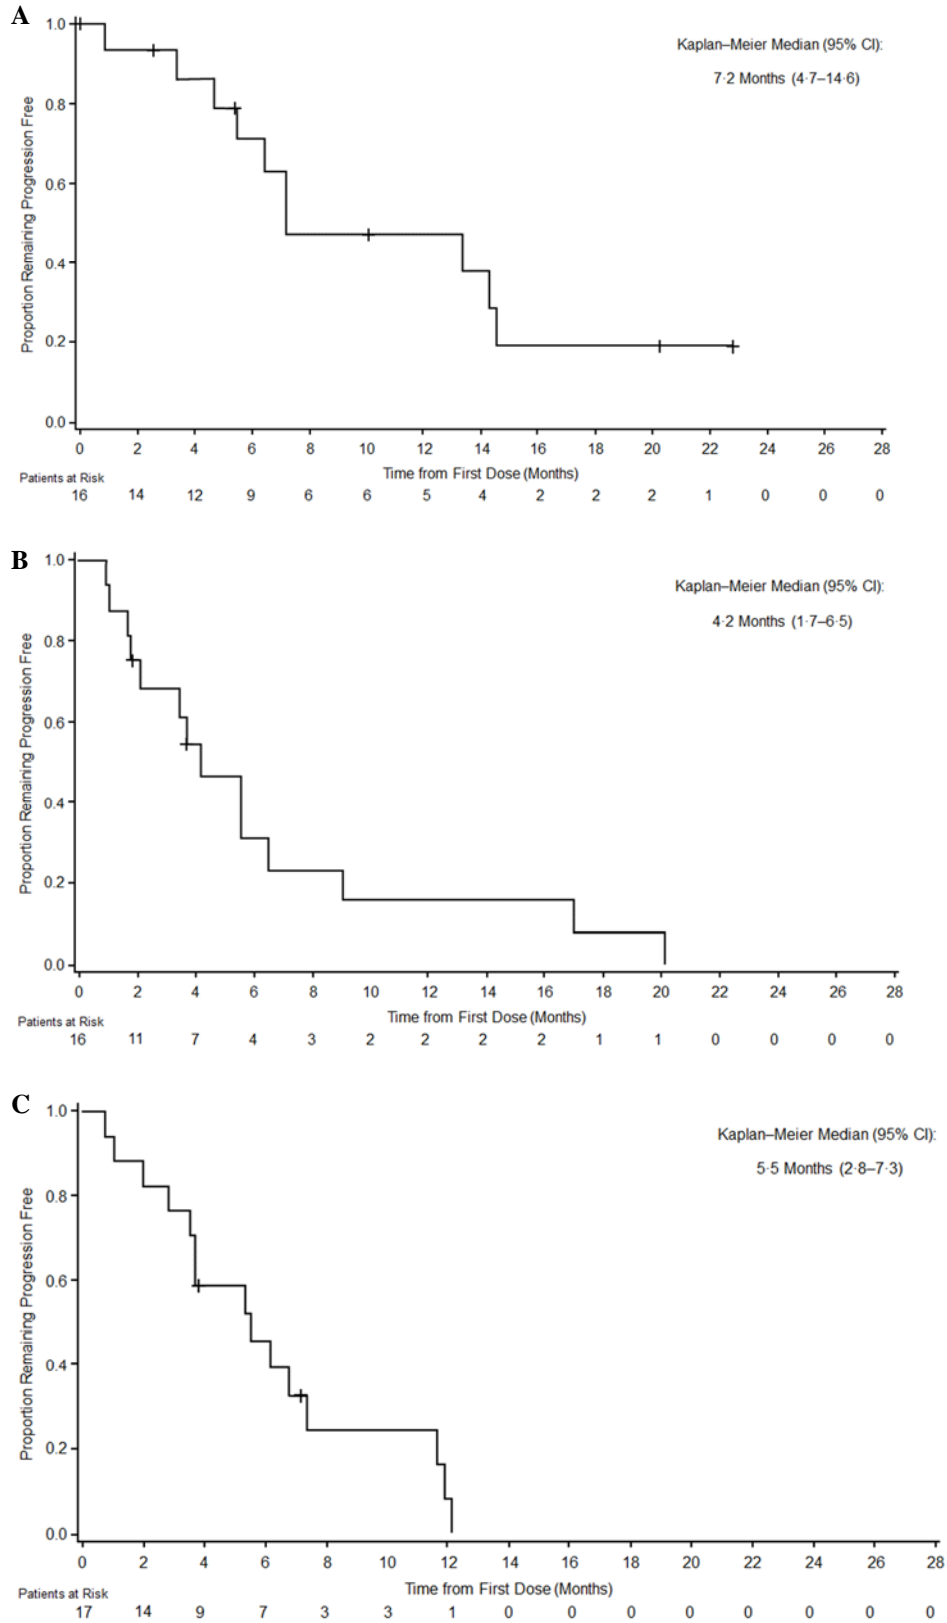

**Figure S4: Overall survival in cohort B (A), cohort C (B), and cohort D (C) by investigator assessment**

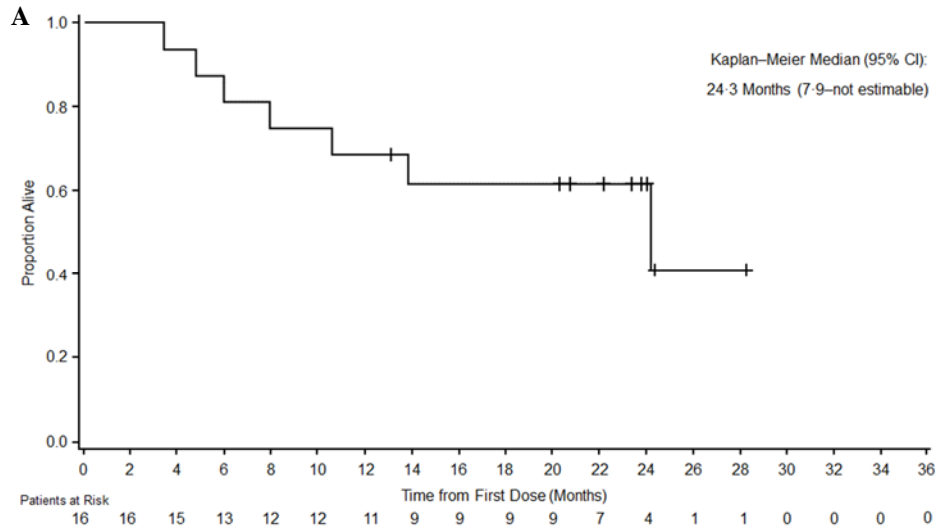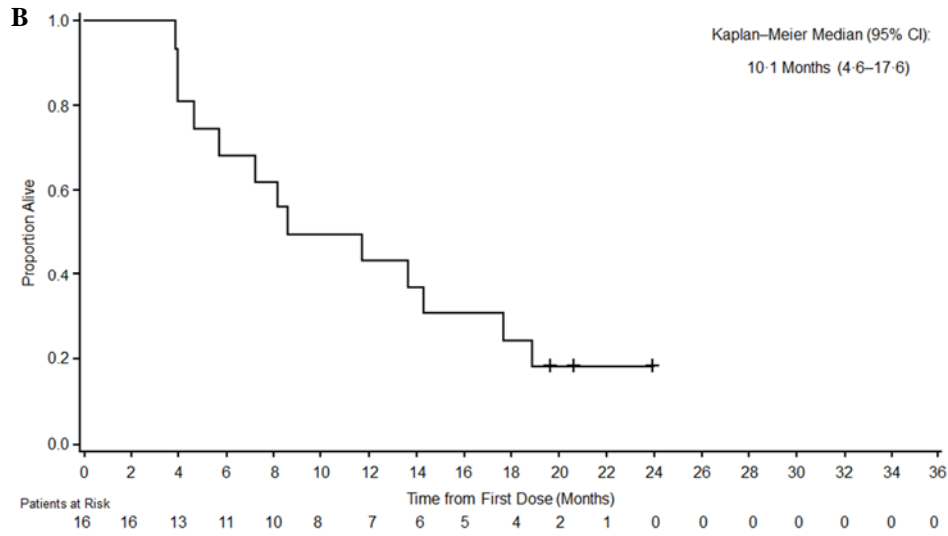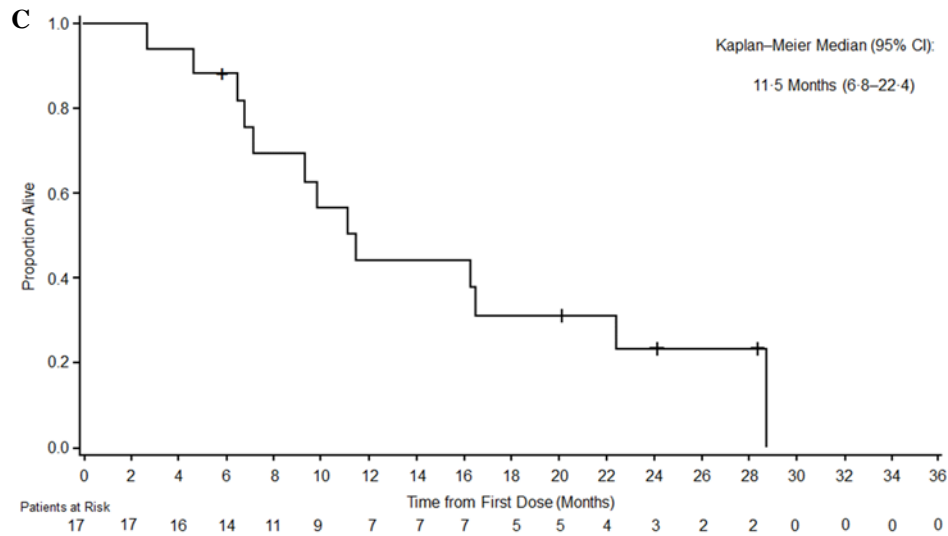



## Supplementary information

### Study site enrolment information

| Principal Investigator   | Study Site, City, Country                                                  | Patients enrolled, n |
|--------------------------|----------------------------------------------------------------------------|----------------------|
| Saiag, Philippe          | Hopital Ambroise Pare, Boulogne-Billancourt, France                        | 13                   |
| Arance Fernández, Ana    | Hospital Clinic i Provincial, Barcelona, Spain                             | 11                   |
| Robert, Caroline         | Institut Gustave Roussy, Villejuif, France                                 | 11                   |
| Chiarion Sileni, Vanna   | Istituto Oncologico Veneto, Padova PD, Italy                               | 8                    |
| Thomas, Luc              | Centre Hospitalier Lyon Sud, Pierre-Bénite, France                         | 8                    |
| Lesimple, Thierry        | Centre Eugène Marquis, Rennes, France                                      | 6                    |
| Mortier, Laurent         | CHRU de Lille - Hôpital Claude Huriez, Lille, France                       | 6                    |
| Moschos, Stergios        | University of North Carolina at Chapel Hill, Chapel Hill, NC, USA          | 6                    |
| Hogg, David              | Princess Margaret Hospital, University Health Network, Toronto, ON, Canada | 5                    |
| Marquez Rodas, Ivan      | Hospital General Universatario Gregorio Maranon, Madrid, Spain             | 5                    |
| Del Vecchio, Michele     | Fondazione IRCCS Istituto Nazionale Tumori, Milano, Italy                  | 4                    |
| Lebbé, Céleste           | Hôpital Saint Louis, Paris, France                                         | 4                    |
| Meyer, Nicolas           | Institut Claudius Regaud, Toulouse, France                                 | 4                    |
| Hassel, Jessica          | Universitaetsklinikum Heidelberg, Heidelberg, Germany                      | 3                    |
| Long, Georgina           | Melanoma Institute Australia, Wollstonecraft NSW, Australia                | 3                    |
| Miller, Wilson           | McGill University, Montreal, QC, Canada                                    | 3                    |
| Walker, John             | Cross Cancer Institute, Edmonton, AB, Canada                               | 3                    |
| Conry, Robert            | University of Alabama at Birmingham, Birmingham, AL, USA                   | 2                    |
| Ferrucci, Pier Francesco | Istituto Europeo di Oncologia-IRCCS, Milano, Italy                         | 2                    |
| Grob, Jean-Jacques       | CHU de Marseille - Hôpital de la Timone, Marseille, France                 | 2                    |
| Hauschild, Axel          | Universitaetsklinikum Schleswig-Holstein, Kiel, Germany                    | 2                    |
| Haydon, Andrew           | Alfred Health, Melbourne VIC, Australia                                    | 2                    |
| Montesa Pino, Álvaro     | Hospital Carlos Haya, Málaga, Spain                                        | 2                    |
| Rodríguez Abreu, Delys   | Hospital Insular, Las Palmas, Spain                                        | 2                    |
| Davies, Michael          | University of Texas MD Anderson Cancer Center, Houston, TX, USA            | 1                    |
| Flaherty, Keith          | Massachusetts General Hospital, Boston, MA, USA                            | 1                    |
| Hainaut-Wierzbicka, Ewa  | CHU de Poitiers - La Milétrie, Poitiers, France                            | 1                    |
| Kaatz, Martin            | SRH Wald-Klinikum Gera gGmbH, Gera, Germany                                | 1                    |
| Kudchadkar, Ragini       | Winship Cancer Institute, Emory University, Atlanta, GA, USA               | 1                    |
| Martín Algarra, Salvador | Clinica Universidad de Navarra, Navarra, Spain                             | 1                    |
| Soriano Teruel, Virtudes | Instituto Valenciano de Oncologia, València, Spain                         | 1                    |
| Alizadeh, Aaron          | Georgia Cancer Specialists, Decatur, GA                                    | 1                    |
